# Supplementary material for: Development and External Validation of a Novel Prediction Model for the TraumaTriage App
Source: Research Square preprint supplement (doi:10.21203/rs.3.rs-7960154/v1), 2025-11-19
Supplement: Supplementary file 1 [file 646c763e10d9cd2d509ce0eb.docx]

**Appendix 1.** Gradient Boosting Decision Tree model

A Gradient Boosting Decision Tree model is an ensemble learning technique that combines multiple decision trees to iteratively refine predictions.16 Each decision tree is sequentially trained with the residuals of the previous tree, to adjust for the errors in the previously estimated model and improve the accuracy of the subsequent model. The xgb.cv function was used to calculate the cross-validated errors and determine the number of trees with the minimal root mean squared error (RMSE). Hyperparameter in the primary model (ISS ≥ 16) were set at a maximum tree-depth of 6, learning rate of 0.3, minimal child rate of 1, subsample of 1, and the best number of trees = 22.

Information about the hyperparameters is available at: <https://xgboost.readthedocs.io/en/latest/parameter.html>
