# Supplementary figures and images for: Development and External Validation of a Novel Prediction Model for the TraumaTriage App
Source: Research Square preprint supplement (doi:10.21203/rs.3.rs-7960154/v1), 2025-11-19

**Appendix 3.** Field triage criteria of the Dutch National Protocol of Ambulance Services


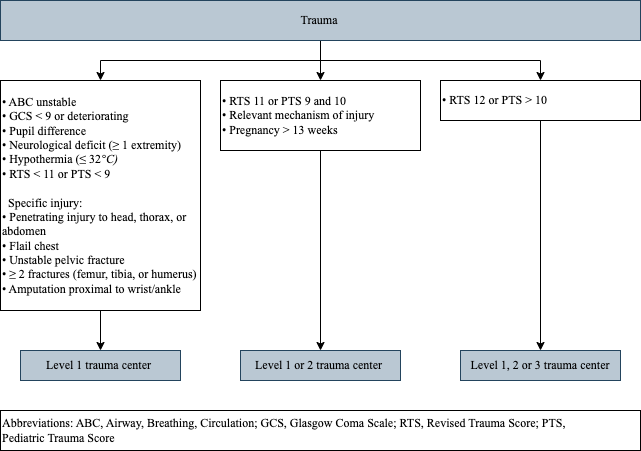

Supplement: Supplementary file 2 [file 8065042f372a93cf9f29c9d7.docx]
